# Supplementary material for: N6-Methylandenosine-Related lncRNAs Play an Important Role in the Prognosis and Immune Microenvironment of Pancreatic Ductal Adenocarcinoma
Source: Research Square preprint supplement (doi:10.21203/rs.3.rs-274618/v1), 2021-03-05
Supplement: Supplementary file 1 [file 1f60b69e784d425ca70c5555.xlsx]

## Sheet: Sheet1
Table S1 The baseline characteristics of patients included in this study
Characteristics	TCGA (n, %)	ICGC (n, %)
Age
> 65	69 (49.3%)	35 (55.6%)
≤ 65	71 (50.7%)	28 (44.4%)
Gender
Female	66 (47.1%)	32 (50.8%)
Male	74 (52.9%)	31 (49.2%)
Smoking
Yes	63 (45.0%)	–
No	50 (35.7%)	–
NA	27 (19.3%)	–
Alcohol
Yes	79 (56.4%)	–
No	49 (35.0%)	–
NA	12 (8.57%)	–
Diabetes
Yes	31 (22.1%)	–
No	85 (60.7%)	–
NA	24 (17.1%)	–
Chronic Pancreatitis
Yes	11 (7.86%)	–
No	100 (71.4%)	–
NA	29 (20.7%)	–
Grade
G1	18 (12.9%)	1 (1.59%)
G2	81 (57.9%)	39 (61.9%)
G3-4	41 (29.3%)	22 (34.9%)
GX	–	1 (1.59%)
Tumor location
Head of Pancreas	114 (81.4%)	–
Body & Tail of Pancreas	20 (14.3%)	–
Other	6 (4.29%)	–
Tumorsize
≤2cm	5 (3.57%)	–
>2cm & ≤4cm	84 (60.0%)	–
>4cm	51 (36.4%)	–
Stage
I	11 (7.86%)	–
II	123 (87.9%)	–
III/IV	6 (4.29%)	–
T stage
T1	4 (2.86%)	–
T2	14 (10.0%)	4 (6.35%)
T3	119 (85.0%)	56 (88.9%)
T4	3 (2.14%)	1 (1.59%)
TX	–	2 (3.17%)
N stage
N0	35 (25.0%)	16 (25.4%)
N1	105 (75.0%)	45 (71.4%)
Nx	–	2 (3.17%)
M stage
M0	67 (47.9%)	2 (3.17%)
M1	3 (2.14%)	3 (4.76%)
Mx	70 (50.0%)	58 (92.1%)
Survival status
Alive	57 (40.7%)	26 (41.3%)
Dead	83 (59.3%)	37 (58.7%)
KRAS mutation
Yes	66 (47.1%)	–
No	53 (37.9%)	–
NA	21 (15.0%)	–
TP53 mutation
Yes	69 (49.3%)	–
No	50 (35.7%)	–
NA	21 (15.0%)	–
